# Supplementary material
Source: MDPI journal article supplement (https://www.mdpi.com/2073-4352/11/7/773)
Supplement: s1 [file s1]

# Tailoring Water Adsorption Capacity of APO-Tric

Suzana Mal <sup>1,2</sup>, Alenka Ristić <sup>1,\*</sup>, Amalija Golobič <sup>3</sup> and Nataša Zabukovec Logar <sup>1,4</sup>

<sup>1</sup> National Institute of Chemistry, Hajdrihova 19, SI-1001 Ljubljana, Slovenia; suzana.mal@ki.si (S.M.); nataša.zabukovec@ki.si (N.Z.L.)

<sup>2</sup> Jožef Stefan International Postgraduate School, Jamova cesta 39, 1000 Ljubljana, Slovenia

<sup>3</sup> Faculty of Chemistry and Chemical Technology, University of Ljubljana, Večna pot 113, SI-1000 Ljubljana, Slovenia; amalija.golobic@fkkt.uni-lj.si

<sup>4</sup> School of Science, University of Nova Gorica, Vipavska 13, SI-5000 Nova Gorica, Slovenia

\* Correspondence: alenka.ristic@ki.si; Tel.: +386-1-476-0215

† This paper is an extended version of our paper published in: Mal, S.; Ristić, A.; Golobič, A.; Logar, N.Z. Tailoring Water Adsorption Capacity of Aluminophosphate AlPO-34. In *The 15th International Conference on Energy Storage ENERSTOCK2021, Ljubljana, Slovenia, 9–11 June, 2021, Proceeding*; Faculty of Mechanical Engineering University of Ljubljana—The National Institute of Chemistry Slovenia: Ljubljana, Slovenia, 2021, 97.

## Supplementary Materials

**Table S1.** Summary of crystallographic data and structure analyses of APO-Tric prepared at the elevated pressure.

| Structure                                                                                               | APO-Tric-LT                                                                                  | APO-Tric-RT                                                                                  |
|---------------------------------------------------------------------------------------------------------|----------------------------------------------------------------------------------------------|----------------------------------------------------------------------------------------------|
| Empirical formula                                                                                       | C <sub>5</sub> H <sub>9</sub> Al <sub>3</sub> FN <sub>2</sub> O <sub>12</sub> P <sub>3</sub> | C <sub>5</sub> H <sub>9</sub> Al <sub>3</sub> FN <sub>2</sub> O <sub>12</sub> P <sub>3</sub> |
| <i>M<sub>r</sub></i>                                                                                    | 481.99                                                                                       | 481.99                                                                                       |
| Cell setting, space group                                                                               | Triclinic, P-1, No.2                                                                         | Triclinic, P-1, No.2                                                                         |
| Temperature (K)                                                                                         | 150(1)                                                                                       | 293(2)                                                                                       |
| <i>a</i> (Å)                                                                                            | 9.0759(5)                                                                                    | 9.0875(5)                                                                                    |
| <i>b</i> (Å)                                                                                            | 9.2136(5)                                                                                    | 9.2281(5)                                                                                    |
| <i>c</i> (Å)                                                                                            | 9.2924(5)                                                                                    | 9.3073(5)                                                                                    |
| $\alpha$ (°)                                                                                            | 76.229(5)                                                                                    | 76.515(5)                                                                                    |
| $\beta$ (°)                                                                                             | 87.188(4)                                                                                    | 87.258(4)                                                                                    |
| $\gamma$ (°)                                                                                            | 89.565(4)                                                                                    | 89.442(4)                                                                                    |
| <i>V</i> (Å <sup>3</sup> )                                                                              | 753.79(7)                                                                                    | 758.13(7)                                                                                    |
| <i>Z</i>                                                                                                | 2                                                                                            | 2                                                                                            |
| <i>D<sub>x</sub></i> (Mg m <sup>-3</sup> )                                                              | 2.124                                                                                        | 2.111                                                                                        |
| Radiation type, wavelength (Å)                                                                          | Mo K $\alpha$ , 0.71073                                                                      | Mo K $\alpha$ , 0.71073                                                                      |
| $\mu$ (mm <sup>-1</sup> )                                                                               | 0.653                                                                                        | 0.649                                                                                        |
| <i>F</i> (000)                                                                                          | 484                                                                                          | 484                                                                                          |
| Crystal form, colour                                                                                    | prism, colourless                                                                            | prism, colourless                                                                            |
| Crystal size (mm)                                                                                       | 0.26 × 0.25 × 21                                                                             | 0.26 × 0.25 × 21                                                                             |
| Absorption correction                                                                                   | multiscan                                                                                    | multiscan                                                                                    |
| No. of measured and indep. reflec.                                                                      | 7184, 3932                                                                                   | 6652, 3925                                                                                   |
| No of ( <i>F</i> <sup>2</sup> > 2.0 $\sigma$ ( <i>F</i> <sup>2</sup> )) reflections                     | 3337                                                                                         | 3308                                                                                         |
| <i>R<sub>int</sub></i>                                                                                  | 0.027                                                                                        | 0.024                                                                                        |
| $\theta$ range (°)                                                                                      | 2.8–30.5                                                                                     | 3.1–30.3                                                                                     |
| Full-matrix refinement on                                                                               | <i>F</i> <sup>2</sup>                                                                        | <i>F</i> <sup>2</sup>                                                                        |
| R[ <i>F</i> <sup>2</sup> > 2 $\sigma$ ( <i>F</i> <sup>2</sup> )], wR( <i>F</i> <sup>2</sup> ), <i>S</i> | 0.036, 0.099, 1.03                                                                           | 0.035, 0.101, 1.05                                                                           |
| $\Delta\rho_{\max}$ , $\Delta\rho_{\min}$ (eÅ <sup>-3</sup> )                                           | 0.68, −0.56                                                                                  | 0.45, −0.48                                                                                  |
| No. of parameters                                                                                       | 237                                                                                          | 237                                                                                          |
| No. of contributing reflections                                                                         | 3932                                                                                         | 3925                                                                                         |

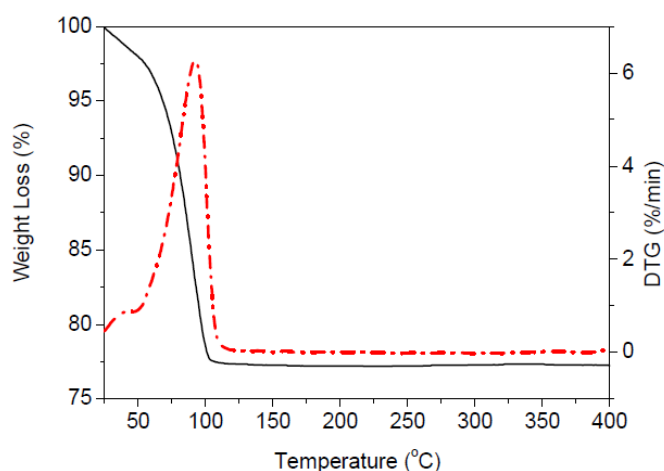

**Figure S1.** TG/DTG curves of hydrated APO-Tric-HT.

**Supplementary Materials:** Table S1: Summary of crystallographic data and structure analyses of APO-Tric prepared at the elevated pressure. Figure S1: TG/DTG curves of hydrated APO-Tric-HT

**Author Contributions:** The following statements should be used Conceptualization, A.R.; formal analysis, S.M., A.G.; investigation, S.M.; writing—original draft preparation, A.R., A.G.; writing—review and editing, A.R., N.Z.L.; visualization, S.M., A.R. and A.G.; supervision A.R., funding acquisition, N.Z.L. All authors have read and agreed to the published version of the manuscript.

**Funding:** Financial support from the Slovenian Research Agency through research program P1-0021 (Nanoporous materials) is acknowledged.

**Institutional Review Board Statement:** Not applicable.

**Informed Consent Statement:** Not applicable.

**Data Availability Statement:** In accordance with MDPI Research Data Policies.

**Acknowledgments:** We thank Edi Kranjc for XRD measurements and Mojca Opresnik for SEM pictures.

**Conflicts of Interest:** The authors declare no conflict of interest. The funders had no role in: the design of the study; in the collection, analyses, or interpretation of data; in the writing of the manuscript, and in the decision to publish the results.

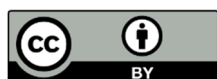

© 2020 by the authors. Submitted for possible open access publication under the terms and conditions of the Creative Commons Attribution (CC BY) license (<http://creativecommons.org/licenses/by/4.0/>).
